# Supplementary material for: Phosphorylation of FE65 at threonine 579 by GSK3β stimulates amyloid precursor protein processing
Source: PubMed Central journal article supplement (PMC5622059; doi:10.1038/s41598-017-12334-2), 2017-09-29

**Phosphorylation of FE65 at threonine 579 by GSK3 $\beta$  stimulates amyloid precursor protein processing**

Yat Shing Lee<sup>1</sup>, Wan Ning Vanessa Chow<sup>1</sup> and Kwok-Fai Lau<sup>1\*</sup>

<sup>1</sup>School of Life Sciences, Faculty of Science, The Chinese University of Hong Kong, Shatin, N.T., Hong Kong SAR

\* Corresponding author: [kflau@cuhk.edu.hk](mailto:kflau@cuhk.edu.hk) (email)

Figure 1 full length blots

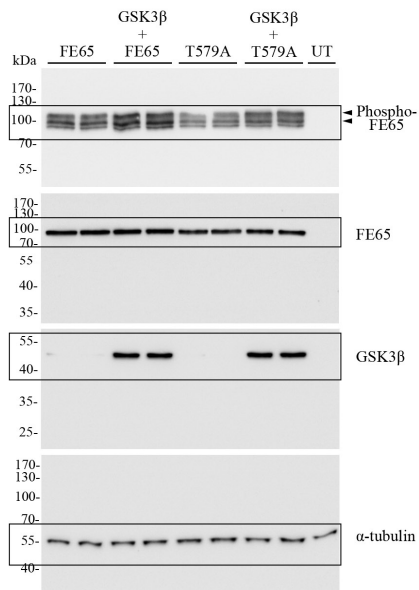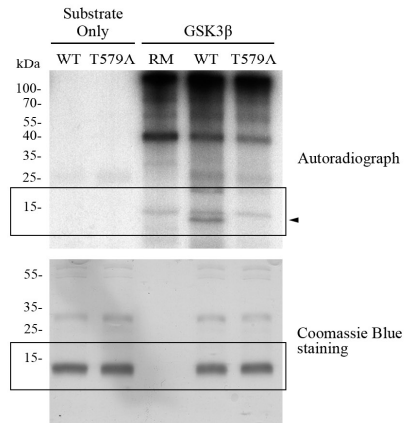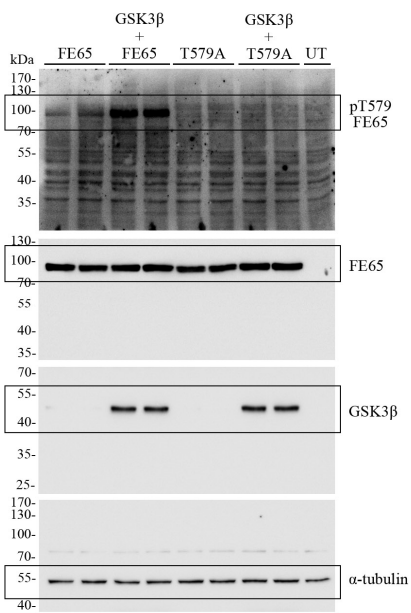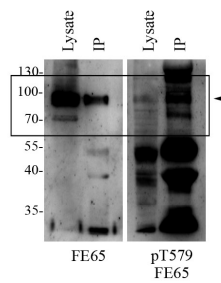

Figure 3 full length blots

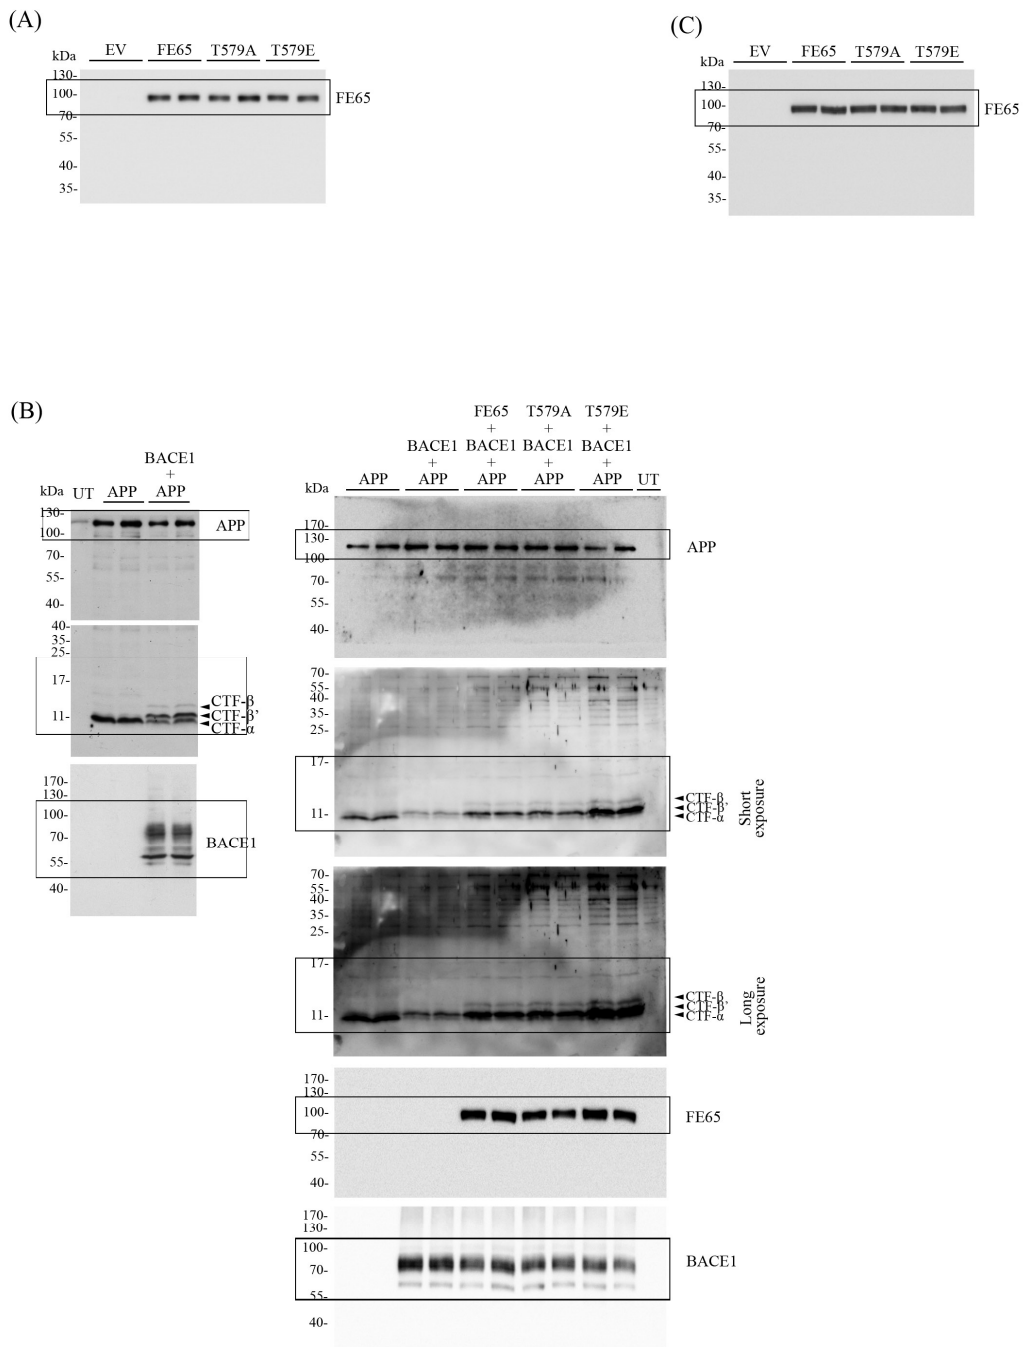

Figure 4 full length blots

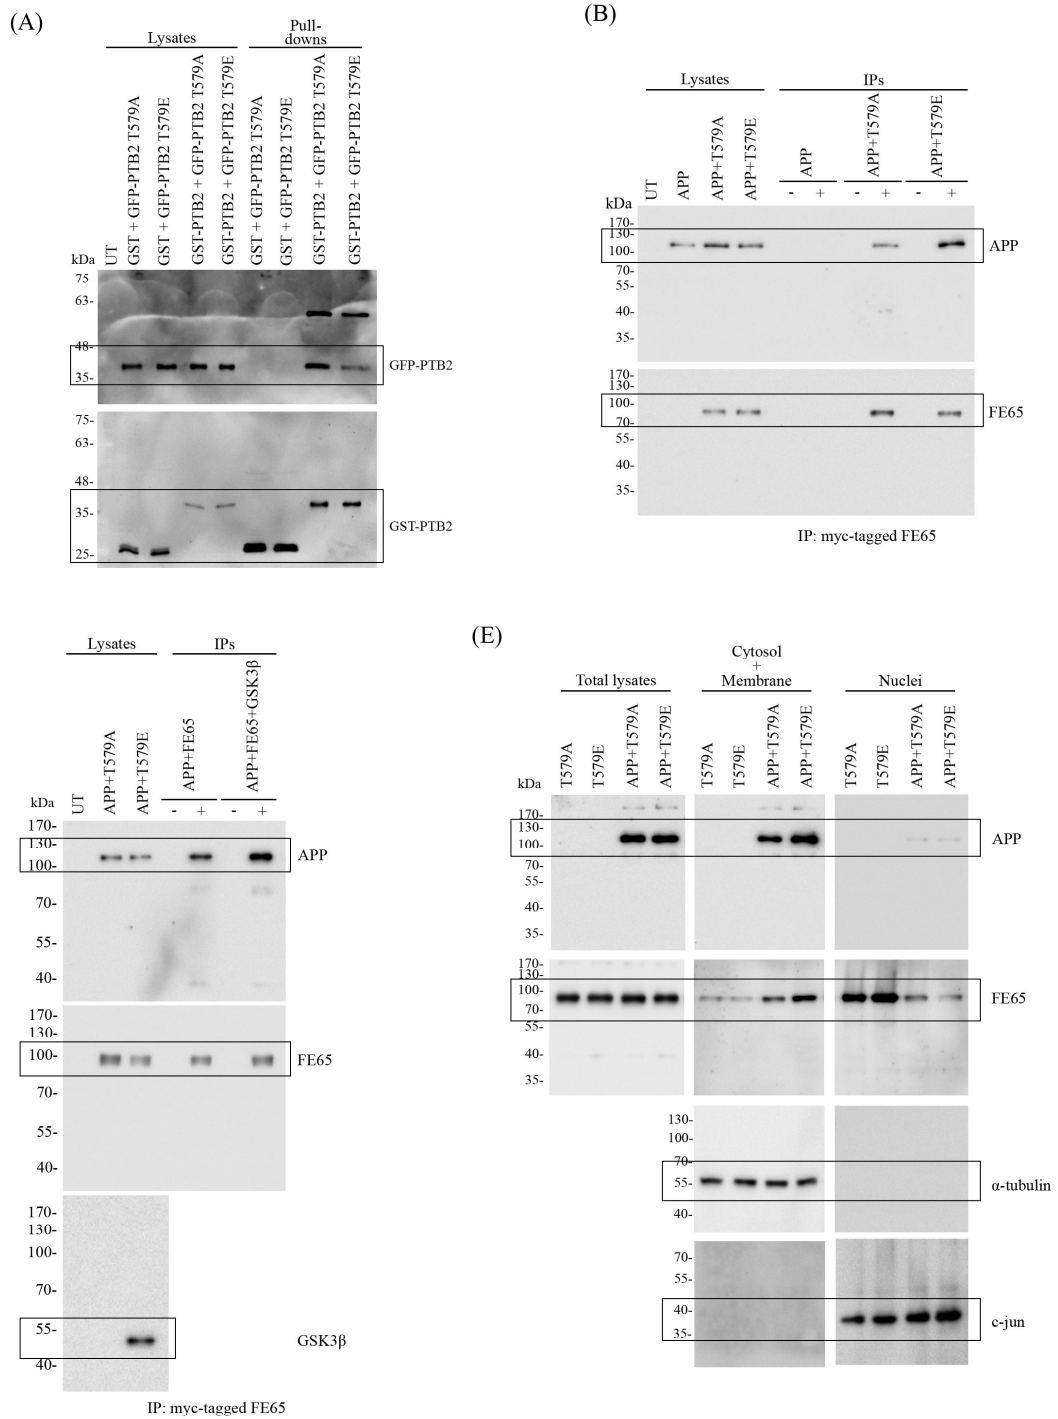

Supplement: 41598_2017_12334_MOESM1_ESM.pdf [file 41598_2017_12334_MOESM1_ESM.pdf]
